# Supplementary material
Source: PubMed Central journal article supplement (PMC4404891)
Supplement: tmh-0042-0039-s01.pdf [file tmh-0042-0039-s01.pdf]

**Original Article**

---

# **Monitoring of Hematopoietic Chimerism by Real-Time Quantitative PCR of Micro Insertions/Deletions in Samples with Low DNA Quantities**

Christian Bach<sup>a</sup> Elmira Tomova<sup>a</sup> Katja Goldmann<sup>a</sup> Volker Weisbach<sup>b</sup>  
Wolf Roesler<sup>a</sup> Andreas Mackensen<sup>a</sup> Julia Winkler<sup>a</sup> Bernd  
M. Spriewald<sup>a</sup>

<sup>a</sup>Department of Internal Medicine 5, Hematology/Oncology, University Hospital Erlangen, Erlangen, Germany; <sup>b</sup>Department of Transfusion Medicine and Hemostaseology, University Hospital Erlangen, Erlangen, Germany

## **Supplemental Material**

---

Christian Bach, PhD  
Department of Internal Medicine 5, Hematology/Oncology  
Laboratory for Immunogenetics, University Hospital Erlangen  
Glücksstraße 4a, 91054 Erlangen, Germany  
christian.bach@uk-erlangen.de

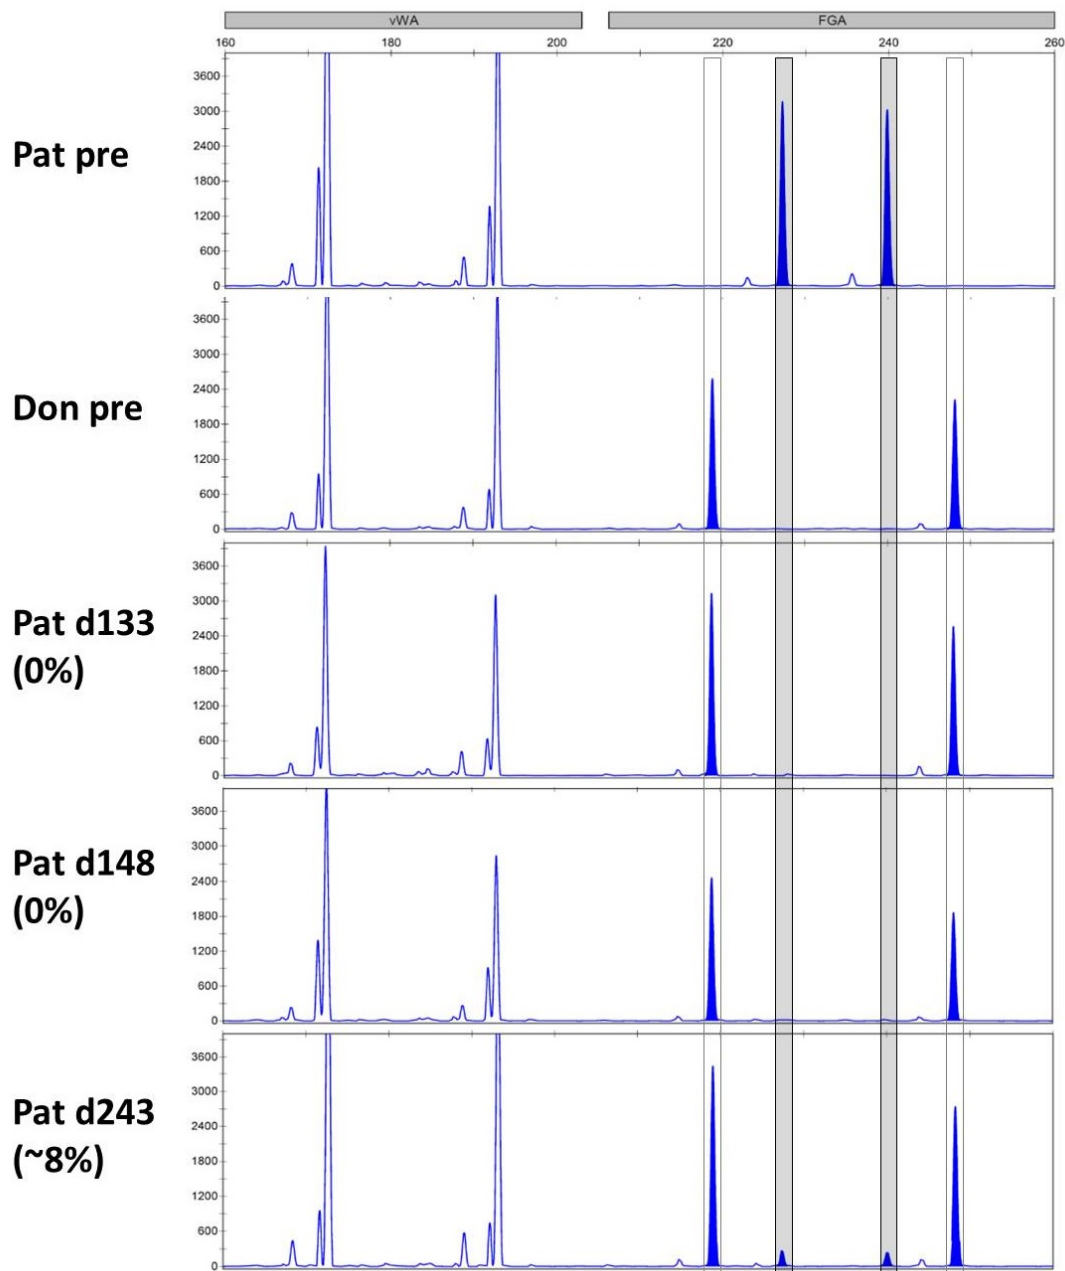

**Supplemental fig. 1.** Graphical example of STR-PCR analysis.

A visual example of STR-PCR peak analysis of patient 13 (compare to supplemental fig. 2). Fluorescence peaks of donor alleles in the FGA locus are boxed, patient alleles are boxed and shaded. Re-emerging recipient chimerism is revealed by re-appearance of patient allele peaks in the sample from day 243. Note that only one of the 3 alleles used for analysis is shown as an example.

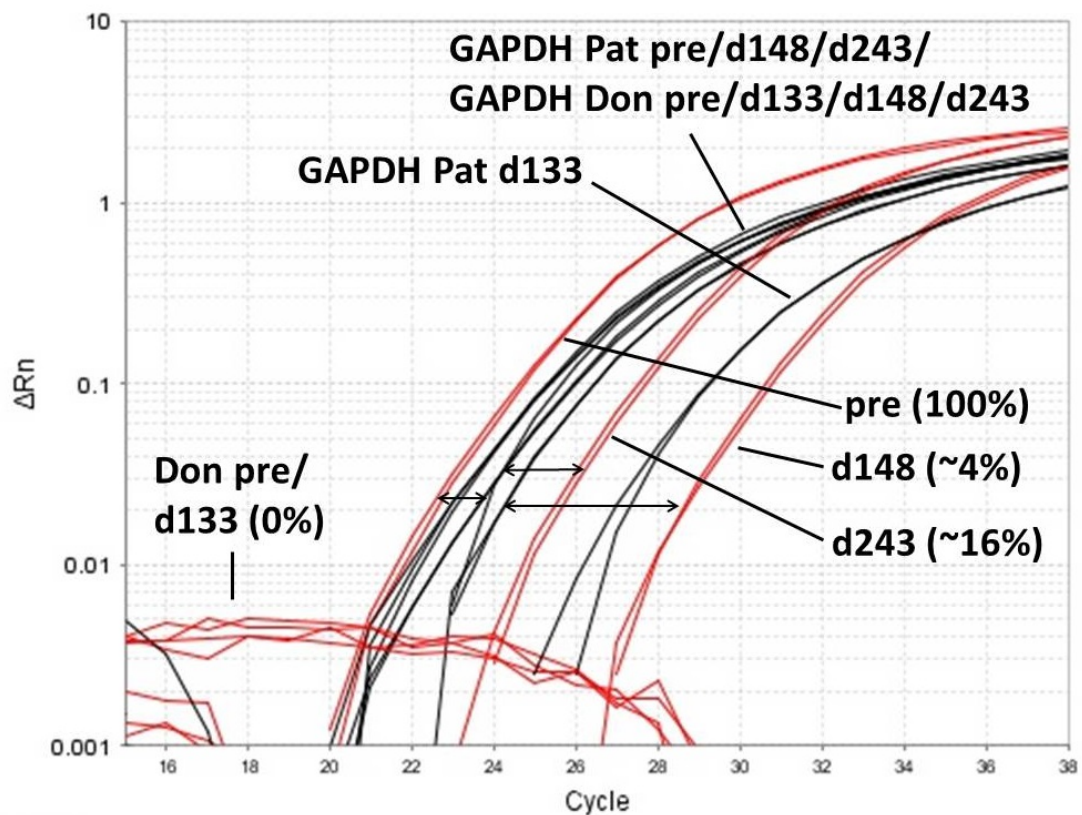

**Supplemental fig. 2.** Graphical example of indel-qPCR analysis.

A visual example of indel-qPCR analysis of patient 13 (compare to supplemental fig. 1).  $\Delta R_n$  (change of normalized fluorescence) on a logarithmic scale is plotted against the PCR cycle (= amplification plot). Curves for GAPDH and the marker 8a at different time points are colored black and red respectively. Double headed arrows roughly indicate the delta ct for quantification. Re-emerging recipient chimerism is evident by a decrease in delta ct in samples from day 148 and 243, whereas no recipient allele could be detected in the sample from day 133. Note that only one of the 2 alleles used for analysis is shown as an example.
